# Supplementary material for: Deep viral blood metagenomics reveals extensive anellovirus diversity in healthy humans
Source: Sci Rep. 2021 Mar 25;11:6921. doi: 10.1038/s41598-021-86427-4 (PMC7994813; doi:10.1038/s41598-021-86427-4)
Supplement: Supplementary file 8 — Supplementary Information 8. [file 41598_2021_86427_MOESM8_ESM.xlsx]

## Sheet: MatrixOutput
Genotype/Sequence	TTV1-TA278	TTV2-CH71	TTV3-HEL32	TTV4-Pt-TTV6	TTV5-TCHN-C1	TTV6-KAV	TTV7-PMV	TTV8-Kt-08F	TTV9-BM1C-18	TTV10-JT34F	TTV11-TCHN-D1	TTV12-CT44F	TTV13-TCHN-A	TTV14-CH65-1	TTV15-TJN01	TTV16-TUS01	TTV17-SENV-G	TTV18-SENV-C	TTV19-SANBAN	TTV20-SAa-10	TTV21-TCHN-B	TTV22-svi-1	TTV23-CH65-2	TTV24-SAa-01	TTV25-Mf-TTV9	TTV26-Mf-TTV3	TTV27-CT23F	TTV28-CT43F	TTV29-TTVyon-KC009	TW53A30	TW53A37	FL100	ViPi04	tth20	TCHN-C2	TYM9	P1-c1	P1-c2	P1-c3	P1-c4	P1-c5	P1-c6	P1-c7	P1-c8	P1-c10	P1-c13	P1-c14	P1-c17	P1-c18
TTV1-TA278
TTV2-CH71	0.599061
TTV3-HEL32	0.616343	0.622473
TTV4-Pt-TTV6	0.577871	0.615747	0.60206
TTV5-TCHN-C1	0.561853	0.588868	0.606516	0.550402
TTV6-KAV	0.540426	0.546018	0.54381	0.553333	0.511111
TTV7-PMV	0.514898	0.536398	0.533333	0.530172	0.503479	0.596767
TTV8-Kt-08F	0.521905	0.524425	0.539048	0.545324	0.501916	0.589048	0.646336
TTV9-BM1C-18	0.526291	0.518939	0.51716	0.531265	0.492862	0.542493	0.539972	0.556974
TTV10-JT34F	0.527936	0.518836	0.541846	0.53484	0.511728	0.54933	0.543612	0.55748	0.635475
TTV11-TCHN-D1	0.525012	0.526365	0.523142	0.524544	0.494125	0.536436	0.544227	0.549625	0.609823	0.624595
TTV12-CT44F	0.505121	0.509859	0.524476	0.512172	0.49162	0.535311	0.544351	0.552421	0.641414	0.624064	0.612254
TTV13-TCHN-A	0.494411	0.505529	0.494471	0.507042	0.480216	0.489666	0.490104	0.497592	0.474922	0.50491	0.473001	0.482525
TTV14-CH65-1	0.459032	0.495457	0.477011	0.498575	0.44232	0.458694	0.466006	0.474733	0.460952	0.484762	0.458924	0.485064	0.557771
TTV15-TJN01	0.491841	0.503788	0.510859	0.521186	0.481685	0.51567	0.501641	0.517192	0.492733	0.475991	0.487929	0.500234	0.50463	0.499299
TTV16-TUS01	0.498834	0.520152	0.527895	0.521924	0.537351	0.520803	0.523121	0.531987	0.52599	0.519962	0.518676	0.508523	0.535338	0.492424	0.623596
TTV17-SENV-G	0.481381	0.481638	0.500701	0.509859	0.490373	0.498811	0.501182	0.486448	0.490858	0.470699	0.480707	0.494398	0.533435	0.478241	0.595336	0.583794
TTV18-SENV-C	0.485226	0.503526	0.522812	0.513928	0.489834	0.50586	0.495331	0.506573	0.498377	0.499766	0.50046	0.497457	0.538222	0.505391	0.606565	0.599723	0.568493
TTV19-SANBAN	0.476793	0.510146	0.504695	0.496484	0.46982	0.48926	0.494479	0.479465	0.508971	0.492601	0.494624	0.491796	0.532522	0.491966	0.539786	0.570442	0.521179	0.564315
TTV20-SAa-10	0.496265	0.497385	0.521307	0.496212	0.471201	0.49381	0.49569	0.503577	0.502128	0.487071	0.472378	0.492019	0.515152	0.496891	0.536653	0.549486	0.520202	0.532407	0.590676
TTV21-TCHN-B	0.501867	0.500472	0.497191	0.504492	0.472998	0.502146	0.493352	0.496918	0.506294	0.505877	0.47963	0.50303	0.511423	0.487143	0.542884	0.546009	0.542765	0.526927	0.541491	0.543811
TTV22-svi-1	0.45735	0.49026	0.488156	0.493265	0.472514	0.495296	0.484484	0.48993	0.483811	0.475012	0.472744	0.485912	0.505274	0.488595	0.564679	0.53945	0.522944	0.540036	0.550898	0.53839	0.558864
TTV23-CH65-2	0.472603	0.505844	0.510738	0.504202	0.481277	0.500236	0.495409	0.496474	0.481585	0.492063	0.480148	0.488858	0.499742	0.501404	0.551582	0.537453	0.508506	0.536473	0.54942	0.526852	0.57931	0.567518
TTV24-SAa-01	0.482587	0.507003	0.519743	0.504669	0.500931	0.510358	0.511233	0.512893	0.510648	0.504237	0.491494	0.489598	0.504925	0.504417	0.565278	0.550526	0.526364	0.557228	0.564352	0.562037	0.594123	0.588342	0.607975
TTV25-Mf-TTV9	0.445559	0.460658	0.47158	0.463579	0.426641	0.457545	0.468116	0.449148	0.476258	0.453677	0.458215	0.45381	0.437972	0.416789	0.44636	0.459486	0.444604	0.438897	0.451737	0.437048	0.44605	0.420283	0.437946	0.450309
TTV26-Mf-TTV3	0.427619	0.444286	0.457563	0.454806	0.442112	0.455026	0.459885	0.465898	0.468456	0.481481	0.471636	0.47277	0.434343	0.438369	0.45774	0.471463	0.457035	0.463015	0.460439	0.453028	0.457035	0.431628	0.447887	0.457571	0.483716
TTV27-CT23F	0.477003	0.484718	0.498563	0.48407	0.476099	0.480676	0.473485	0.47619	0.472813	0.488636	0.480598	0.490832	0.457939	0.43747	0.476865	0.482875	0.47	0.474504	0.465072	0.469828	0.47258	0.456813	0.496935	0.462701	0.498571	0.490978
TTV28-CT43F	0.484979	0.48433	0.494516	0.478718	0.494603	0.481428	0.466572	0.468975	0.48528	0.495035	0.496704	0.484677	0.471868	0.447166	0.461356	0.495923	0.46383	0.466761	0.46778	0.460728	0.462751	0.434803	0.474178	0.479079	0.486667	0.484677	0.604816
TTV29-TTVyon-KC009	0.481605	0.493092	0.493072	0.483948	0.476221	0.470189	0.469378	0.488261	0.484516	0.488582	0.490094	0.494324	0.458981	0.456081	0.469183	0.49711	0.470029	0.46878	0.479446	0.461797	0.467178	0.448325	0.483537	0.479717	0.495487	0.485849	0.615814	0.642292
TW53A30	0.467139	0.491974	0.486151	0.480576	0.471264	0.504803	0.473659	0.493469	0.496695	0.49737	0.492958	0.489422	0.460568	0.455331	0.47469	0.496873	0.446036	0.465812	0.479426	0.467245	0.468095	0.453023	0.473088	0.487943	0.449668	0.455939	0.455666	0.455812	0.472727
TW53A37	0.544647	0.531177	0.532578	0.545198	0.5	0.530689	0.52644	0.530086	0.54554	0.544808	0.550117	0.541842	0.485462	0.472064	0.507801	0.503996	0.503745	0.505985	0.508483	0.506155	0.52307	0.474436	0.490637	0.487963	0.452967	0.457143	0.470785	0.478718	0.484863	0.47964
FL100	0.560575	0.639543	0.596304	0.599024	0.573718	0.523504	0.527536	0.524425	0.519774	0.535014	0.508439	0.509514	0.500402	0.523416	0.508299	0.53178	0.468961	0.516286	0.509447	0.483539	0.496881	0.5	0.512178	0.521404	0.435614	0.450644	0.475362	0.463082	0.463379	0.488744	0.519068
ViPi04	0.514245	0.528058	0.523742	0.536023	0.521351	0.58596	0.640813	0.615891	0.536699	0.523945	0.535466	0.542831	0.492569	0.466184	0.523742	0.531205	0.5031	0.501646	0.506232	0.493506	0.490754	0.488962	0.486091	0.507533	0.472789	0.466762	0.458037	0.472302	0.480439	0.491631	0.520418	0.513709
tth20	0.55364	0.56307	0.560847	0.55973	0.515444	0.62894	0.593913	0.595714	0.568376	0.569706	0.553191	0.5633	0.509554	0.475775	0.512747	0.526493	0.509606	0.51567	0.514203	0.496618	0.509353	0.490593	0.507619	0.50095	0.468324	0.462241	0.491024	0.49564	0.491971	0.521739	0.543509	0.548132	0.589524
TCHN-C2	0.483193	0.51528	0.520038	0.500703	0.476102	0.495495	0.494484	0.489464	0.49858	0.492692	0.485915	0.48237	0.539707	0.502361	0.54864	0.55959	0.530303	0.555246	0.618762	0.613815	0.540968	0.545203	0.537931	0.572888	0.443801	0.447932	0.465038	0.457619	0.461538	0.461207	0.491525	0.506887	0.482229	0.507937
TYM9	0.512218	0.514851	0.506983	0.522128	0.496636	0.506629	0.519886	0.521186	0.526536	0.52294	0.506241	0.512821	0.524031	0.502374	0.569579	0.563492	0.547325	0.537753	0.563959	0.559392	0.631555	0.567294	0.581502	0.602914	0.45546	0.451841	0.484025	0.477413	0.47376	0.482808	0.519195	0.493852	0.526042	0.532666	0.570566
P1-c1	0.501821	0.5103	0.521942	0.508204	0.507407	0.514421	0.512714	0.511331	0.508181	0.513146	0.494205	0.498368	0.511942	0.496953	0.55877	0.557576	0.531136	0.548775	0.566713	0.563076	0.591472	0.597001	0.609626	0.835788	0.447633	0.450704	0.472381	0.481324	0.483397	0.482168	0.504695	0.50104	0.511175	0.521368	0.577808	0.6099
P1-c2	0.47804	0.517112	0.515194	0.517016	0.483792	0.5	0.507329	0.501416	0.494156	0.498364	0.495132	0.491841	0.530327	0.511584	0.61859	0.625869	0.588935	0.603653	0.561234	0.520055	0.530556	0.542831	0.52394	0.542357	0.427412	0.45614	0.453941	0.469504	0.474109	0.489777	0.509091	0.525377	0.512784	0.510699	0.563187	0.54608	0.536708
P1-c3	0.486787	0.504454	0.504682	0.519608	0.46691	0.508026	0.492063	0.50403	0.493259	0.48686	0.474217	0.489075	0.524834	0.494429	0.764075	0.614133	0.591033	0.592644	0.548193	0.532964	0.544536	0.548652	0.533606	0.561065	0.445394	0.453691	0.469205	0.466667	0.470672	0.468366	0.507042	0.501718	0.508251	0.515065	0.560897	0.565934	0.548725	0.633835
P1-c4	0.477106	0.494123	0.507757	0.496732	0.49045	0.494578	0.494713	0.516619	0.503268	0.495119	0.490278	0.497666	0.52637	0.502543	0.585388	0.552448	0.540976	0.567356	0.569094	0.539815	0.57077	0.629061	0.599821	0.642309	0.447482	0.454374	0.457922	0.465534	0.476145	0.479905	0.496026	0.501725	0.505944	0.511751	0.562327	0.621337	0.63807	0.555708	0.577413
P1-c5	0.486628	0.49381	0.494993	0.493295	0.46961	0.471214	0.472183	0.494732	0.486923	0.489331	0.485405	0.496695	0.455859	0.445731	0.467903	0.497592	0.472262	0.471395	0.4689	0.472902	0.48637	0.455786	0.48378	0.493879	0.494107	0.47896	0.629991	0.636111	0.810156	0.484025	0.489209	0.466667	0.477143	0.493683	0.469154	0.479048	0.502367	0.470839	0.465818	0.477208
P1-c6	0.490032	0.509443	0.52977	0.510956	0.504242	0.519203	0.507801	0.512416	0.510271	0.506052	0.516204	0.501162	0.524472	0.497183	0.602721	0.604426	0.57799	0.699042	0.549562	0.536832	0.521899	0.559927	0.540404	0.566204	0.447633	0.464775	0.482531	0.47234	0.49001	0.48835	0.50565	0.509925	0.508797	0.524566	0.552957	0.553555	0.55663	0.614227	0.600901	0.551142	0.501899
P1-c7	0.478082	0.49113	0.499303	0.492308	0.478287	0.486385	0.473029	0.491302	0.497471	0.507892	0.492694	0.482201	0.518353	0.498872	0.557861	0.548282	0.511775	0.542404	0.57342	0.528671	0.563393	0.64969	0.598537	0.622162	0.451399	0.468343	0.46676	0.470313	0.486398	0.481273	0.478562	0.502743	0.489729	0.50495	0.549675	0.593306	0.620626	0.551264	0.551898	0.652569	0.485701	0.550184
P1-c8	0.483562	0.509311	0.52095	0.503941	0.490876	0.511737	0.503506	0.513183	0.50994	0.504617	0.499312	0.506002	0.505764	0.498615	0.569028	0.562789	0.537415	0.553425	0.574919	0.550844	0.576171	0.818021	0.591383	0.624829	0.442545	0.461251	0.463889	0.467886	0.467925	0.465638	0.494669	0.506831	0.507779	0.527066	0.564384	0.57971	0.631841	0.560544	0.554652	0.650624	0.469397	0.558266	0.685906
P1-c10	0.488329	0.515498	0.525513	0.513333	0.48244	0.503118	0.520803	0.511079	0.51593	0.509748	0.48892	0.502128	0.524181	0.503516	0.54364	0.563746	0.538601	0.554323	0.615065	0.708738	0.55368	0.533486	0.54965	0.560521	0.457726	0.455587	0.484322	0.471861	0.478219	0.486734	0.522066	0.494888	0.511336	0.5247	0.618056	0.561865	0.566759	0.551105	0.554323	0.561111	0.487217	0.542475	0.53732	0.557392
P1-c13	0.491667	0.510578	0.531557	0.506573	0.502117	0.511837	0.507512	0.511584	0.491887	0.497672	0.492173	0.496048	0.52863	0.498825	0.597919	0.602955	0.575349	0.767622	0.542818	0.541381	0.537088	0.546533	0.527132	0.550505	0.440646	0.46016	0.488196	0.472616	0.466033	0.464489	0.504923	0.516529	0.511804	0.52619	0.550505	0.543716	0.552823	0.599727	0.592742	0.546119	0.481324	0.687752	0.541381	0.560954	0.55326
P1-c14	0.607459	0.628115	0.659732	0.595205	0.582071	0.551282	0.547143	0.542911	0.534086	0.54298	0.527154	0.532114	0.519515	0.498321	0.528965	0.534176	0.497421	0.520427	0.508004	0.50142	0.519925	0.487227	0.511955	0.505302	0.464734	0.459819	0.496392	0.496169	0.505046	0.468197	0.54588	0.605614	0.528571	0.570339	0.499289	0.523213	0.516854	0.511204	0.537377	0.496953	0.507205	0.510387	0.48954	0.509749	0.511396	0.509611
P1-c17	0.602866	0.617249	0.679576	0.597475	0.585213	0.527384	0.514462	0.527187	0.519718	0.529719	0.522145	0.522004	0.518286	0.491679	0.516525	0.517899	0.49324	0.509478	0.517322	0.497646	0.49113	0.489665	0.485994	0.502515	0.457431	0.441121	0.490674	0.484546	0.492594	0.493581	0.529056	0.59944	0.524286	0.562678	0.498828	0.515488	0.509749	0.524407	0.513577	0.51139	0.48927	0.526957	0.490522	0.50438	0.506836	0.516597	0.655188
P1-c18	0.486848	0.485497	0.491679	0.488061	0.469206	0.48599	0.490728	0.484012	0.49858	0.511871	0.488952	0.499532	0.442328	0.45155	0.468197	0.484586	0.470196	0.482219	0.474714	0.472745	0.47011	0.45122	0.49053	0.473011	0.494532	0.484507	0.706929	0.610798	0.631063	0.471313	0.480476	0.456522	0.474762	0.493046	0.463602	0.486886	0.485579	0.456966	0.464387	0.464661	0.645746	0.486628	0.47081	0.467612	0.483238	0.485021	0.500239	0.47456
P1-c20	0.486157	0.515152	0.495854	0.498339	0.48549	0.472454	0.479475	0.501656	0.492037	0.49725	0.503535	0.501093	0.472486	0.471719	0.472995	0.500276	0.481843	0.485046	0.474891	0.472588	0.485197	0.470524	0.506274	0.488525	0.507963	0.489874	0.621432	0.641316	0.844327	0.479201	0.49309	0.484716	0.48739	0.506979	0.466338	0.480874	0.492635	0.491028	0.484256	0.48136	0.832013	0.52342	0.492166	0.480874	0.490421	0.49429	0.519934	0.499725	0.61828
P1-c21	0.482759	0.505764	0.50024	0.5	0.492614	0.470531	0.469544	0.48688	0.483688	0.49905	0.489451	0.502347	0.473741	0.462694	0.472302	0.498307	0.473458	0.484375	0.494011	0.47447	0.468675	0.46103	0.495495	0.499053	0.501196	0.48258	0.638228	0.64545	0.69137	0.48784	0.477284	0.506869	0.486886	0.485158	0.481	0.488283	0.4945	0.476872	0.468661	0.472302	0.682584	0.500952	0.488669	0.481324	0.487179	0.489331	0.513748	0.514409	0.641421
P2-c2	0.498326	0.498808	0.501674	0.488249	0.494231	0.473837	0.481375	0.49976	0.489048	0.501664	0.493635	0.496927	0.473515	0.465509	0.471429	0.498794	0.47056	0.485106	0.472448	0.472142	0.478927	0.451719	0.489422	0.486563	0.494547	0.483522	0.62442	0.655093	0.827335	0.488061	0.487032	0.486957	0.489747	0.489279	0.460545	0.471149	0.488857	0.471707	0.469118	0.477889	0.804189	0.498101	0.481013	0.473635	0.485244	0.476799	0.50938	0.495702	0.641492
P2-c3	0.483381	0.481114	0.475309	0.487143	0.483146	0.474952	0.464201	0.479347	0.482008	0.491453	0.488011	0.472496	0.463286	0.456292	0.478814	0.483215	0.456808	0.468165	0.474824	0.467422	0.467427	0.44403	0.49789	0.488732	0.475036	0.492286	0.579487	0.709425	0.642857	0.460363	0.482431	0.469242	0.474359	0.486291	0.477003	0.482219	0.482791	0.476324	0.478992	0.47289	0.636616	0.474719	0.466387	0.476457	0.475581	0.472183	0.494762	0.478487	0.58252
P2-c4	0.606731	0.601774	0.686897	0.589528	0.581454	0.535883	0.520095	0.529551	0.521596	0.533524	0.515618	0.51779	0.511979	0.484116	0.509443	0.509504	0.48743	0.504155	0.516854	0.514339	0.49113	0.478042	0.483916	0.502277	0.458694	0.438746	0.490926	0.488095	0.483994	0.479315	0.526462	0.583158	0.525238	0.561254	0.499531	0.506704	0.514392	0.516713	0.504454	0.507914	0.488317	0.51805	0.488029	0.496081	0.510108	0.513791	0.647356	0.868838	0.481217
P2-c5	0.488796	0.518571	0.53041	0.509142	0.484792	0.50403	0.511271	0.502874	0.508523	0.498821	0.478873	0.491302	0.539185	0.515109	0.551565	0.562384	0.536092	0.562674	0.621996	0.617456	0.551676	0.54428	0.555862	0.586815	0.450072	0.451736	0.472222	0.466667	0.469661	0.465038	0.500471	0.508264	0.501441	0.516595	0.890392	0.578923	0.582873	0.568088	0.561043	0.570175	0.472979	0.558918	0.553389	0.564384	0.630143	0.560752	0.511143	0.50211	0.476533
P2-c6	0.49843	0.515829	0.531279	0.512389	0.51476	0.515152	0.5125	0.510638	0.50515	0.519511	0.5	0.492308	0.509744	0.5	0.56685	0.554323	0.535779	0.553711	0.568519	0.561694	0.594582	0.606335	0.601071	0.837561	0.450617	0.464489	0.468379	0.484848	0.484086	0.492918	0.500699	0.504821	0.50619	0.51381	0.580349	0.609368	0.896414	0.538813	0.551771	0.639712	0.496918	0.567171	0.62265	0.632928	0.577348	0.5545	0.51634	0.516412	0.476938
P2-c7	0.477086	0.498801	0.492063	0.489115	0.478484	0.475562	0.4658	0.496855	0.48415	0.487734	0.494532	0.490224	0.462993	0.454678	0.463602	0.491558	0.473534	0.476733	0.466316	0.470418	0.468403	0.466698	0.484805	0.488825	0.499281	0.48433	0.614554	0.636577	0.849839	0.480945	0.485465	0.488595	0.472342	0.492647	0.463016	0.469937	0.489494	0.472381	0.45679	0.478114	0.847896	0.509776	0.480378	0.480952	0.483309	0.471035	0.505814	0.494949	0.624532
P2-c9	0.501587	0.525415	0.530667	0.519765	0.505162	0.516077	0.517867	0.505342	0.530279	0.513428	0.503912	0.522152	0.530864	0.519501	0.578326	0.56204	0.545267	0.554167	0.559561	0.540568	0.588992	0.785894	0.590224	0.611372	0.440262	0.474503	0.473376	0.463441	0.465508	0.478495	0.505308	0.507216	0.517389	0.530524	0.57269	0.607419	0.621775	0.565329	0.574217	0.64688	0.476732	0.560676	0.672802	0.770115	0.552972	0.55641	0.519405	0.509245	0.490484
P2-c10	0.457098	0.506667	0.496331	0.478512	0.486239	0.493033	0.465499	0.501072	0.487098	0.501832	0.490319	0.480021	0.520865	0.488994	0.557792	0.547808	0.531992	0.530729	0.578447	0.527387	0.568841	0.636456	0.597826	0.6206	0.448802	0.465499	0.460116	0.463675	0.476907	0.47703	0.476115	0.482305	0.489785	0.503776	0.552576	0.58603	0.613437	0.542575	0.538778	0.642164	0.473656	0.552116	0.782851	0.684158	0.540284	0.535168	0.489205	0.491864	0.468165
P3-c1	0.506311	0.517356	0.522989	0.518571	0.49754	0.50048	0.513304	0.505814	0.515108	0.500707	0.486923	0.501189	0.528213	0.492176	0.570566	0.580056	0.542519	0.56662	0.653828	0.585422	0.565628	0.548507	0.539106	0.571563	0.457611	0.47258	0.474192	0.476872	0.477033	0.482558	0.522445	0.512663	0.507056	0.522904	0.617729	0.592437	0.563815	0.585072	0.571891	0.586142	0.474617	0.555095	0.576476	0.575967	0.608414	0.554633	0.522989	0.51836	0.47736
P3-c2	0.607843	0.629577	0.667593	0.594633	0.583175	0.549075	0.537911	0.549242	0.528996	0.534672	0.527622	0.534272	0.520338	0.49976	0.523267	0.526882	0.490858	0.515574	0.495763	0.49078	0.520188	0.490724	0.507267	0.509912	0.461353	0.452857	0.49543	0.484674	0.493513	0.470869	0.542603	0.59353	0.529804	0.568431	0.49053	0.522548	0.514259	0.504669	0.527033	0.495787	0.50048	0.508026	0.491155	0.513213	0.505453	0.510549	0.870041	0.661165	0.502395
P3-c3	0.56044	0.58133	0.610795	0.563636	0.667855	0.537434	0.50565	0.512783	0.508625	0.5171	0.522812	0.512605	0.484163	0.459497	0.491252	0.519141	0.48018	0.506685	0.482872	0.481944	0.497429	0.479214	0.488642	0.504881	0.436226	0.450118	0.474576	0.48331	0.474183	0.467619	0.521392	0.546012	0.529131	0.522496	0.485568	0.502321	0.507449	0.487535	0.486301	0.499077	0.477605	0.492455	0.484559	0.493844	0.49792	0.508242	0.593542	0.581681	0.494318
P4-c1	0.610803	0.617249	0.678193	0.597475	0.576441	0.530217	0.512784	0.526714	0.51784	0.526866	0.524942	0.52294	0.514345	0.489554	0.521246	0.517177	0.493482	0.50831	0.52294	0.501412	0.49253	0.488073	0.486461	0.50274	0.46176	0.443495	0.492109	0.485497	0.486383	0.490252	0.529248	0.59944	0.527143	0.564577	0.49789	0.515488	0.512999	0.523013	0.511704	0.509066	0.478779	0.527426	0.489843	0.500231	0.510829	0.516597	0.656566	0.935949	0.477889
P4-c2	0.514392	0.512676	0.522207	0.508673	0.49016	0.508499	0.528249	0.512459	0.522885	0.508159	0.497931	0.505346	0.519608	0.493144	0.545413	0.549296	0.546373	0.525517	0.553221	0.553555	0.697548	0.553677	0.571429	0.603567	0.45702	0.437706	0.476529	0.477952	0.470029	0.482219	0.528478	0.50104	0.508004	0.53381	0.548911	0.659401	0.606393	0.527816	0.548402	0.584018	0.478364	0.530387	0.562729	0.570782	0.573557	0.542009	0.521415	0.504404	0.474487
P4-c3	0.60084	0.627007	0.659259	0.597555	0.589308	0.54226	0.532666	0.542558	0.536068	0.545194	0.526957	0.521536	0.525844	0.494747	0.522128	0.52521	0.495775	0.50953	0.509142	0.508971	0.518779	0.487512	0.514981	0.510157	0.470247	0.456065	0.504803	0.490926	0.502887	0.465228	0.540019	0.597046	0.526064	0.55715	0.505437	0.514432	0.524544	0.511639	0.523005	0.49113	0.509353	0.513615	0.490196	0.512749	0.506856	0.513577	0.841139	0.650991	0.50024
P5-c1	0.48686	0.508945	0.520599	0.513869	0.503636	0.516833	0.508427	0.511837	0.50765	0.502793	0.493315	0.503724	0.525778	0.496234	0.606803	0.600371	0.580631	0.772025	0.553083	0.544793	0.538108	0.550659	0.528044	0.545496	0.44207	0.458569	0.490557	0.461756	0.461101	0.474905	0.518519	0.506198	0.514894	0.529804	0.56325	0.552055	0.544004	0.609211	0.601538	0.543379	0.469311	0.691892	0.545082	0.568733	0.565378	0.87234	0.501878	0.510023	0.483119
P6-c1	0.479335	0.495119	0.512821	0.522021	0.491007	0.49697	0.501156	0.511111	0.482201	0.513812	0.489684	0.487321	0.829705	0.575101	0.532243	0.539175	0.517226	0.56456	0.534387	0.520718	0.503448	0.514654	0.525308	0.533608	0.445709	0.452582	0.454167	0.4782	0.48066	0.478261	0.49977	0.508737	0.500703	0.520188	0.552198	0.523091	0.536808	0.543092	0.529891	0.540761	0.474847	0.54178	0.521988	0.51906	0.536172	0.548168	0.521272	0.525854	0.450704
P6-c2	0.479784	0.503487	0.507226	0.521094	0.483813	0.491841	0.482663	0.503546	0.477115	0.503223	0.47868	0.503458	0.766667	0.582432	0.543764	0.554474	0.522341	0.554487	0.535316	0.525057	0.512184	0.501776	0.520292	0.517604	0.444286	0.448357	0.47037	0.473043	0.472642	0.474053	0.510805	0.501344	0.499766	0.513146	0.545496	0.530407	0.523874	0.538707	0.529625	0.53125	0.464034	0.533152	0.519104	0.522163	0.527206	0.558266	0.518934	0.516159	0.456808
P8-c1	0.492814	0.51322	0.532114	0.513753	0.500606	0.524419	0.507801	0.514804	0.512605	0.509777	0.522222	0.503952	0.522926	0.500939	0.607256	0.603965	0.577535	0.702234	0.550945	0.537753	0.521899	0.559012	0.542241	0.562037	0.450502	0.473759	0.485836	0.478487	0.489058	0.487874	0.508945	0.512663	0.509748	0.528902	0.554333	0.554017	0.558011	0.613315	0.604505	0.558447	0.503324	0.938793	0.555709	0.565041	0.542936	0.689996	0.512276	0.525551	0.485196
P8-c2	0.573059	0.597475	0.622905	0.565318	0.947644	0.525768	0.519303	0.519678	0.517544	0.535002	0.516114	0.517385	0.476697	0.479491	0.5	0.540679	0.488979	0.507107	0.490323	0.481889	0.480609	0.495872	0.498174	0.520516	0.432292	0.456041	0.487252	0.499765	0.492206	0.479848	0.518415	0.587398	0.538425	0.533999	0.492173	0.506393	0.525253	0.496812	0.488859	0.50023	0.484677	0.5161	0.495459	0.507029	0.496337	0.51897	0.593735	0.597493	0.491525
P8-c3	0.711842	0.602438	0.605093	0.596369	0.559002	0.524621	0.505331	0.507123	0.514006	0.517258	0.520891	0.510402	0.498485	0.468056	0.4935	0.507714	0.479819	0.493793	0.491819	0.493446	0.499768	0.470402	0.48331	0.487075	0.445242	0.433712	0.470922	0.475238	0.47799	0.478814	0.55881	0.572016	0.522128	0.539524	0.495091	0.50994	0.5	0.497457	0.49723	0.478281	0.48233	0.489135	0.488647	0.489284	0.493724	0.497698	0.593371	0.617988	0.475238
P8-c4	0.524743	0.530047	0.543366	0.528558	0.500309	0.551174	0.552766	0.562648	0.609667	0.633842	0.734517	0.623465	0.49041	0.472222	0.493948	0.526591	0.474449	0.505078	0.494588	0.492221	0.50515	0.501376	0.496513	0.494205	0.472183	0.47277	0.494398	0.500944	0.5045	0.492509	0.562558	0.504219	0.5554	0.564577	0.498825	0.536232	0.500936	0.503724	0.491423	0.500926	0.497167	0.512999	0.499543	0.522957	0.511584	0.505587	0.5496	0.539326	0.510578
P8-c5	0.491465	0.504881	0.499767	0.518776	0.481415	0.502098	0.502543	0.515366	0.493296	0.516575	0.486474	0.497003	0.956522	0.563964	0.52089	0.551229	0.526174	0.554945	0.534387	0.523941	0.52046	0.515098	0.506156	0.519433	0.447131	0.453991	0.464815	0.479606	0.468868	0.475456	0.502989	0.501344	0.509142	0.523005	0.543498	0.529035	0.524005	0.534884	0.538043	0.530797	0.466385	0.538147	0.523057	0.513298	0.531593	0.545002	0.522207	0.522622	0.460094
P8-c8	0.492812	0.497672	0.500467	0.512252	0.481415	0.497199	0.49213	0.508049	0.488673	0.493132	0.476845	0.508748	0.762597	0.580631	0.528689	0.546425	0.529385	0.549154	0.53839	0.542241	0.509425	0.503996	0.514612	0.524725	0.452042	0.452247	0.460825	0.467136	0.480923	0.478261	0.505287	0.491968	0.511268	0.522128	0.544124	0.526099	0.528657	0.534065	0.527363	0.543311	0.475248	0.530612	0.51299	0.521027	0.545455	0.544218	0.520804	0.52196	0.451977
P8-c9	0.505361	0.522867	0.523543	0.514219	0.492241	0.544981	0.542603	0.555869	0.641907	0.633239	0.632644	0.806584	0.483412	0.477825	0.493897	0.517781	0.489949	0.490251	0.491549	0.487034	0.492754	0.486549	0.482358	0.474074	0.468765	0.476865	0.503296	0.49435	0.504245	0.499762	0.545798	0.514831	0.539972	0.575284	0.489171	0.512138	0.498603	0.49113	0.489292	0.492019	0.502354	0.496494	0.487748	0.504868	0.505698	0.487001	0.543366	0.52602	0.503065
P8-c10	0.49253	0.508298	0.511584	0.516266	0.485627	0.513552	0.497653	0.522716	0.492488	0.478992	0.488145	0.499532	0.513138	0.501641	0.920761	0.621596	0.592949	0.606481	0.538031	0.527164	0.535747	0.562701	0.546373	0.567918	0.443645	0.45584	0.468839	0.463438	0.468705	0.472979	0.506629	0.509356	0.520685	0.516859	0.550785	0.565741	0.559688	0.615842	0.752688	0.585734	0.463148	0.591178	0.554478	0.564941	0.541899	0.595918	0.529719	0.521513	0.46408
P8-c13	0.609497	0.614918	0.676349	0.600373	0.581614	0.52381	0.512057	0.523607	0.51383	0.525641	0.511173	0.519869	0.516432	0.494777	0.514851	0.520167	0.486285	0.507607	0.508181	0.495063	0.489977	0.488777	0.488112	0.499772	0.461095	0.444919	0.487584	0.48835	0.488517	0.484805	0.520167	0.59944	0.524489	0.558559	0.495318	0.518467	0.513676	0.521356	0.511921	0.509285	0.481375	0.522472	0.493536	0.50046	0.503056	0.505135	0.658861	0.92085	0.474286
P8-c20	0.513623	0.527035	0.54902	0.521868	0.535153	0.515476	0.526061	0.527578	0.517857	0.529307	0.52087	0.510676	0.541333	0.538596	0.632243	0.918079	0.584736	0.61188	0.586306	0.550997	0.546248	0.558772	0.542609	0.565319	0.457576	0.464029	0.486388	0.4997	0.496073	0.491863	0.507683	0.519648	0.531646	0.528632	0.558974	0.566265	0.573563	0.631013	0.623711	0.565118	0.505435	0.604202	0.54535	0.559727	0.557248	0.60771	0.547493	0.527337	0.485507
P9-c1	0.701058	0.604108	0.601207	0.59311	0.558608	0.520509	0.503477	0.510638	0.512138	0.520567	0.516713	0.510402	0.49798	0.466759	0.502786	0.508136	0.479564	0.494031	0.494413	0.486034	0.486362	0.459326	0.479708	0.487596	0.450024	0.436879	0.468085	0.474762	0.476555	0.481481	0.553241	0.57358	0.527187	0.541015	0.494413	0.5	0.498634	0.48686	0.498615	0.484517	0.4766	0.496995	0.477293	0.4839	0.483333	0.501609	0.593677	0.61503	0.470476
P9-c2	0.481748	0.49619	0.489971	0.488215	0.487773	0.478198	0.478779	0.497829	0.49	0.495483	0.499293	0.499291	0.46688	0.447356	0.466762	0.498068	0.475918	0.469805	0.472249	0.46985	0.482494	0.464336	0.490335	0.476326	0.501905	0.47896	0.639589	0.637337	0.887615	0.475849	0.489209	0.47016	0.48619	0.490998	0.462644	0.48111	0.479315	0.47	0.46752	0.476054	0.813076	0.498804	0.477872	0.471788	0.482775	0.475036	0.511304	0.497135	0.641133
P9-c4	0.486585	0.506798	0.519774	0.515962	0.489375	0.5	0.492154	0.515759	0.507779	0.514339	0.487611	0.497191	0.529084	0.503724	0.561088	0.561258	0.528302	0.562471	0.643253	0.620435	0.56421	0.553085	0.562902	0.56814	0.445568	0.45786	0.487363	0.48528	0.480019	0.477825	0.508845	0.496957	0.499045	0.528934	0.638965	0.584481	0.576676	0.556621	0.566254	0.562471	0.476872	0.550665	0.554348	0.568841	0.647515	0.555556	0.51322	0.521678	0.48021
P10-c2	0.608495	0.617716	0.678193	0.595605	0.587719	0.52644	0.513731	0.52435	0.523005	0.529719	0.524942	0.527622	0.516432	0.491453	0.513692	0.521356	0.493017	0.510157	0.517322	0.498588	0.492063	0.491284	0.486461	0.506393	0.460798	0.444919	0.493544	0.489301	0.493072	0.489301	0.52507	0.60014	0.525714	0.560304	0.498828	0.520111	0.514392	0.522083	0.508427	0.506741	0.48784	0.524144	0.489843	0.504841	0.508945	0.517064	0.64876	0.939107	0.479791
P10-c3	0.481535	0.499524	0.489494	0.486551	0.48906	0.476744	0.478302	0.499759	0.489048	0.49786	0.499764	0.498345	0.468165	0.44898	0.468197	0.5	0.473534	0.469805	0.471292	0.469368	0.480576	0.463864	0.490335	0.477746	0.502857	0.478487	0.63683	0.639627	0.885163	0.479197	0.489688	0.469432	0.487619	0.490511	0.462165	0.479197	0.47884	0.47	0.469891	0.47749	0.811954	0.500717	0.479491	0.472262	0.480349	0.476938	0.508899	0.49618	0.639276
P10-c4	0.508159	0.51784	0.530261	0.533054	0.489621	0.541489	0.542538	0.548992	0.642922	0.629062	0.628013	0.808413	0.484943	0.47646	0.494237	0.516294	0.47908	0.492216	0.490549	0.479427	0.494922	0.489021	0.478301	0.476125	0.461284	0.474719	0.502092	0.489262	0.501403	0.504237	0.540553	0.517895	0.533705	0.574337	0.492063	0.508091	0.489135	0.489381	0.493827	0.484722	0.501867	0.497028	0.483059	0.507087	0.509557	0.488859	0.542777	0.52521	0.508427
P10-c5	0.716293	0.609939	0.604253	0.60149	0.570208	0.526515	0.509968	0.512346	0.51774	0.522459	0.516249	0.514101	0.496454	0.47037	0.503714	0.515873	0.483651	0.493793	0.494398	0.491819	0.49675	0.463899	0.481024	0.488678	0.451459	0.43892	0.472813	0.479048	0.478947	0.481168	0.55602	0.568182	0.535782	0.541905	0.492754	0.50393	0.498857	0.491909	0.502308	0.482853	0.479943	0.495608	0.48725	0.483151	0.483961	0.501381	0.599068	0.619444	0.472381
P10-c6	0.526414	0.524953	0.523944	0.527622	0.491358	0.543366	0.53986	0.55917	0.6102	0.650092	0.746377	0.62213	0.473739	0.466761	0.486574	0.521246	0.480501	0.490575	0.486879	0.494382	0.494639	0.47864	0.496296	0.489843	0.469504	0.476056	0.490169	0.487541	0.486321	0.504695	0.548086	0.504581	0.541259	0.559677	0.490858	0.523942	0.500931	0.499768	0.483471	0.495833	0.481377	0.518467	0.490169	0.505969	0.495992	0.492854	0.528169	0.525012	0.490335
P10-c7	0.607843	0.629108	0.665278	0.595574	0.580013	0.551446	0.539342	0.546875	0.53041	0.535151	0.527622	0.533803	0.51981	0.50024	0.524691	0.531089	0.490389	0.515574	0.500942	0.498345	0.522535	0.492579	0.506798	0.510373	0.464251	0.45381	0.498797	0.48659	0.496396	0.469436	0.543071	0.594937	0.530758	0.569862	0.491477	0.526732	0.517999	0.506536	0.527504	0.497659	0.502882	0.512276	0.490223	0.51414	0.509246	0.514299	0.870041	0.668959	0.504789
P11-c1	0.578544	0.607183	0.631991	0.574539	0.946165	0.528814	0.527027	0.524294	0.513201	0.537313	0.519189	0.526024	0.480793	0.506667	0.504622	0.538972	0.480423	0.510383	0.500273	0.483225	0.480263	0.51978	0.508484	0.524363	0.424915	0.454597	0.490363	0.491554	0.491775	0.494017	0.515608	0.591463	0.547138	0.539332	0.490969	0.507859	0.523575	0.498918	0.492707	0.503289	0.487267	0.517685	0.506775	0.515744	0.496511	0.52358	0.596756	0.603889	0.491525
P11-c2	0.481132	0.501162	0.505361	0.521094	0.485012	0.489977	0.483588	0.503546	0.478964	0.5	0.476387	0.502997	0.766667	0.578829	0.538322	0.55401	0.521895	0.555861	0.53671	0.525977	0.514483	0.499556	0.520292	0.518519	0.446183	0.451174	0.468519	0.47023	0.469811	0.474988	0.508966	0.504032	0.499766	0.514554	0.545496	0.527206	0.524329	0.541439	0.526459	0.530344	0.463564	0.53406	0.518665	0.52305	0.526292	0.556459	0.519869	0.518929	0.455399
P12-c1	0.490196	0.51622	0.531353	0.510549	0.480447	0.500237	0.507434	0.500958	0.50142	0.502122	0.48216	0.491772	0.537618	0.515109	0.544491	0.560521	0.536272	0.554782	0.620148	0.619379	0.54702	0.542897	0.551264	0.584494	0.451037	0.448883	0.472222	0.46619	0.47205	0.461207	0.493879	0.50551	0.497598	0.521405	0.884234	0.574745	0.582413	0.563645	0.559524	0.564635	0.473458	0.553874	0.551532	0.562557	0.624074	0.556474	0.511617	0.505391	0.47749
P12-c2	0.485899	0.503985	0.503974	0.513072	0.47116	0.505179	0.488329	0.50166	0.488145	0.486824	0.477901	0.487251	0.528418	0.4935	0.762667	0.615599	0.593651	0.590096	0.54407	0.535076	0.543618	0.547478	0.527513	0.560606	0.446819	0.44774	0.469101	0.464504	0.473709	0.464775	0.508895	0.499656	0.508475	0.519048	0.560731	0.570839	0.549636	0.629982	0.958222	0.568574	0.466289	0.595495	0.54824	0.555856	0.550023	0.595687	0.538787	0.513324	0.465909
P12-c4	0.493802	0.510653	0.483849	0.497959	0.474391	0.47865	0.476768	0.517382	0.489796	0.50336	0.489204	0.486139	0.473469	0.485772	0.474282	0.488529	0.48497	0.453815	0.468185	0.465194	0.492517	0.468071	0.488119	0.465306	0.508808	0.468157	0.632599	0.645959	0.813158	0.474333	0.469822	0.457219	0.4759	0.492723	0.458078	0.48103	0.470748	0.466398	0.470942	0.468432	0.787164	0.472667	0.469236	0.465037	0.473508	0.456493	0.514777	0.497257	0.608234
P7-c1	0.489481	0.519636	0.516859	0.519055	0.471349	0.484672	0.487217	0.494404	0.51633	0.498326	0.489016	0.501679	0.513695	0.501889	0.566434	0.563057	0.528004	0.556338	0.673842	0.575117	0.556188	0.543016	0.547152	0.55791	0.44719	0.454371	0.470273	0.463391	0.480639	0.479961	0.498084	0.511065	0.504873	0.501949	0.606358	0.585434	0.562384	0.572362	0.563889	0.588622	0.479227	0.556643	0.558484	0.565177	0.593205	0.546538	0.519693	0.514368	0.479651
P7-c2	0.528354	0.51008	0.519608	0.520223	0.51221	0.548326	0.535549	0.548826	0.641873	0.604196	0.600366	0.64099	0.48367	0.473709	0.478964	0.511111	0.489195	0.483856	0.490985	0.487037	0.501627	0.465785	0.493981	0.491976	0.461575	0.462441	0.488426	0.473586	0.477955	0.492958	0.5375	0.505579	0.533333	0.565585	0.485273	0.522222	0.493036	0.467401	0.479742	0.492593	0.484338	0.488522	0.484018	0.49381	0.500926	0.471612	0.540793	0.524537	0.490909
P7-c4	0.567123	0.582511	0.606018	0.570014	0.673297	0.534862	0.506086	0.514804	0.509995	0.511757	0.519444	0.513753	0.487952	0.476457	0.5	0.527307	0.479675	0.516249	0.477112	0.483614	0.490715	0.478815	0.48892	0.507407	0.440323	0.450565	0.478814	0.483916	0.482807	0.475783	0.524144	0.539781	0.52766	0.534672	0.486423	0.510865	0.513928	0.492108	0.496103	0.4875	0.4782	0.501156	0.487838	0.49886	0.493724	0.51536	0.600282	0.576905	0.485149
P7-c5	0.491228	0.510023	0.530451	0.511671	0.505495	0.512712	0.509669	0.517112	0.507914	0.513539	0.497003	0.493965	0.515105	0.499066	0.565018	0.558484	0.536685	0.554791	0.569907	0.567308	0.596804	0.606787	0.602922	0.831565	0.454286	0.458569	0.466194	0.48237	0.482336	0.485795	0.498138	0.493113	0.504249	0.512601	0.57989	0.608774	0.901365	0.537972	0.550409	0.637176	0.495063	0.567171	0.617419	0.63616	0.577808	0.551334	0.518881	0.513601	0.476055
P7-c6	0.476653	0.503556	0.523605	0.502865	0.471605	0.501684	0.4969	0.496382	0.518571	0.52149	0.496686	0.499287	0.53149	0.507491	0.549184	0.55368	0.529015	0.567555	0.628866	0.614773	0.553991	0.547153	0.56421	0.578336	0.43913	0.449213	0.479227	0.477218	0.483591	0.474266	0.50495	0.493524	0.495888	0.519847	0.651431	0.576514	0.583333	0.564673	0.565418	0.565783	0.479557	0.552142	0.564878	0.565796	0.626757	0.56121	0.495958	0.507554	0.485196
P7-c8	0.576784	0.580524	0.602241	0.581827	0.658956	0.541549	0.519566	0.530086	0.525749	0.523412	0.523213	0.50953	0.483984	0.46286	0.495409	0.523942	0.484031	0.509858	0.489995	0.486574	0.488858	0.487472	0.502069	0.509451	0.446667	0.45181	0.480489	0.493409	0.478713	0.47884	0.536676	0.572684	0.538644	0.536772	0.492173	0.507586	0.511542	0.494505	0.484225	0.494237	0.491278	0.499087	0.487319	0.512506	0.507346	0.502289	0.591443	0.58345	0.492713
P7-c9	0.525479	0.52354	0.529577	0.522472	0.501852	0.543366	0.543124	0.556341	0.611111	0.649632	0.749094	0.626263	0.476859	0.471004	0.481944	0.52644	0.480501	0.487816	0.487348	0.490637	0.496037	0.47864	0.491204	0.489843	0.462884	0.476056	0.490169	0.490832	0.482547	0.512207	0.54902	0.510218	0.547319	0.560152	0.493202	0.528591	0.500466	0.499305	0.479339	0.501852	0.483263	0.517544	0.497028	0.50551	0.500707	0.49101	0.531455	0.529219	0.493164
P7-c10	0.494936	0.503766	0.515066	0.512712	0.482737	0.493314	0.516997	0.507143	0.52028	0.511871	0.503022	0.506779	0.525078	0.495292	0.553202	0.558989	0.549562	0.546335	0.562942	0.545497	0.697858	0.565059	0.582865	0.602299	0.458154	0.444127	0.475371	0.479885	0.478136	0.477413	0.512138	0.4954	0.508072	0.523741	0.570076	0.65787	0.612813	0.541022	0.557576	0.606314	0.478386	0.530899	0.586887	0.590595	0.563347	0.548252	0.516854	0.496276	0.482014
P7-c16	0.595438	0.623291	0.652816	0.598687	0.588972	0.54321	0.531235	0.540181	0.535596	0.543281	0.52602	0.519663	0.523134	0.496657	0.524482	0.525479	0.494123	0.512785	0.509363	0.507102	0.520657	0.486124	0.514513	0.511542	0.464925	0.457498	0.502402	0.490449	0.503369	0.463789	0.539077	0.599859	0.525108	0.550454	0.506365	0.519553	0.525012	0.51139	0.526291	0.496732	0.511271	0.51264	0.49113	0.513213	0.509943	0.512424	0.839779	0.651034	0.501679
P3-c6	0.489262	0.495035	0.518993	0.514339	0.479167	0.500479	0.51271	0.5	0.522048	0.501883	0.484934	0.493671	0.529042	0.501655	0.547257	0.557423	0.524396	0.567455	0.622581	0.561404	0.549906	0.520989	0.536473	0.552434	0.451659	0.454155	0.472979	0.470196	0.471094	0.471743	0.521574	0.506173	0.517557	0.532266	0.587017	0.554004	0.562994	0.5686	0.568088	0.5554	0.475575	0.572016	0.537063	0.547455	0.582185	0.556777	0.512346	0.508072	0.469544
P3-c7	0.488642	0.508274	0.529577	0.50887	0.504242	0.525367	0.508747	0.508596	0.507003	0.506983	0.518981	0.498138	0.522704	0.495279	0.598639	0.603352	0.577961	0.703552	0.542884	0.532332	0.520631	0.557948	0.531954	0.562037	0.446676	0.466667	0.483947	0.481324	0.482873	0.489301	0.504479	0.513347	0.509272	0.521949	0.553711	0.552011	0.552947	0.610046	0.595011	0.550069	0.498101	0.930481	0.556939	0.568521	0.545497	0.688829	0.506856	0.522738	0.486628
P9-c6	0.699821	0.621723	0.621005	0.589169	0.576376	0.533144	0.499536	0.523135	0.506035	0.526167	0.515697	0.495146	0.508307	0.470339	0.502092	0.517483	0.489815	0.508553	0.478728	0.492041	0.49446	0.482869	0.4943	0.493495	0.462488	0.443343	0.470365	0.479582	0.47042	0.48472	0.537921	0.573136	0.526217	0.548264	0.48617	0.498623	0.508652	0.49792	0.501614	0.48489	0.47456	0.503013	0.493315	0.518315	0.501412	0.501614	0.614641	0.612563	0.468468
[truncated: 54 more columns]
