# Supplementary material for: Deep viral blood metagenomics reveals extensive anellovirus diversity in healthy humans
Source: Sci Rep. 2021 Mar 25;11:6921. doi: 10.1038/s41598-021-86427-4 (PMC7994813; doi:10.1038/s41598-021-86427-4)
Supplement: Supplementary file 9 — Supplementary Information 9. [file 41598_2021_86427_MOESM9_ESM.xlsx]

## Sheet: MatrixOutput
Genotype/Isolate	TTMV1-CBD279	TTMV2-NLC023	TTMV3-NLC026	TTMV4-Pt-TTV8-II	TTMV5-TGP96	TTMV6-CBD203	TTMV7-CLC156	TTMV8-PB4TL	TTMV9-NLC030	TTMV16-LIL-y1	TTMV17-LIL-y2	TTMV11-LIL-y3	TTMV13_LY1	TTMV14-ALH8	TTMV15-D11	zhenjiang	BNI-700831-G1-CSF	Emory1	vzttmv4	BNI-701800-G2-CSF	TTMV12_LY3	TTMV10-ALA22	LIL-y4	SHA	vzttmv3	Emory2	TTMV19-204	TTMV18-222	SH-A	P9-3	KS025	P1-2	P7-3	BNI-700907-G3-SER0	P15-8	Cpz1cl2	Cpz2cl2	GorMcl4	P1-c12	P1-c15	P1-c16	P1-c22	P3-c4	P4-c4	P5-c2	P8-c6	P8-c16	P8-c17	P8-c21
TTMV1-CBD279
TTMV2-NLC023	0.542337
TTMV3-NLC026	0.539658	0.576677
TTMV4-Pt-TTV8-II	0.510972	0.523268	0.535826
TTMV5-TGP96	0.498174	0.47619	0.482579	0.532081
TTMV6-CBD203	0.525601	0.51179	0.519151	0.541146	0.491693
TTMV7-CLC156	0.50209	0.511944	0.520249	0.536547	0.488408	0.573643
TTMV8-PB4TL	0.5	0.504592	0.500518	0.547804	0.499742	0.55899	0.572154
TTMV9-NLC030	0.496651	0.481481	0.494856	0.520124	0.484238	0.54128	0.532002	0.586103
TTMV16-LIL-y1	0.496588	0.501346	0.512618	0.526539	0.495481	0.501312	0.492569	0.500524	0.492913
TTMV17-LIL-y2	0.489764	0.522801	0.517885	0.524409	0.48409	0.516848	0.508799	0.483954	0.480331	0.546223
TTMV11-LIL-y3	0.482687	0.485776	0.502851	0.514493	0.484326	0.557453	0.551063	0.545872	0.5	0.490842	0.480208
TTMV13_LY1	0.49459	0.500541	0.507246	0.558839	0.506646	0.523148	0.519026	0.531186	0.506667	0.496577	0.503359	0.503096
TTMV14-ALH8	0.493789	0.505691	0.517007	0.549974	0.506771	0.517764	0.51298	0.52838	0.4871	0.5056	0.492868	0.49375	0.587841
TTMV15-D11	0.505796	0.503017	0.507353	0.54374	0.510638	0.522955	0.534726	0.523311	0.50625	0.484914	0.49894	0.503419	0.56639	0.555962
zhenjiang	0.476931	0.489752	0.500775	0.559542	0.528455	0.523957	0.511831	0.52185	0.510101	0.488642	0.482115	0.508475	0.547401	0.528292	0.545924
BNI-700831-G1-CSF	0.486305	0.493528	0.508772	0.541085	0.499484	0.5013	0.520541	0.51087	0.508501	0.510301	0.474621	0.482741	0.53323	0.554862	0.519582	0.511759
Emory1	0.504971	0.508401	0.49766	0.535958	0.541859	0.520186	0.516096	0.516796	0.494057	0.48673	0.501304	0.502077	0.552308	0.535101	0.529012	0.54402	0.522326
vzttmv4	0.49454	0.478896	0.4909	0.534483	0.577744	0.495607	0.498965	0.509259	0.503338	0.51981	0.493229	0.496377	0.522495	0.518461	0.517457	0.521563	0.511628	0.565329
BNI-701800-G2-CSF	0.484992	0.489177	0.498958	0.512093	0.551938	0.506729	0.503115	0.508333	0.496875	0.478077	0.475078	0.486133	0.526615	0.512902	0.519618	0.538742	0.525984	0.57001	0.558308
TTMV12_LY3	0.521127	0.502415	0.516901	0.549081	0.504644	0.522032	0.526316	0.527563	0.511352	0.512698	0.50209	0.530327	0.517611	0.501304	0.510471	0.516975	0.49974	0.521964	0.521739	0.508386
TTMV10-ALA22	0.488854	0.479504	0.50959	0.536547	0.504167	0.556247	0.553838	0.592705	0.593985	0.492639	0.482993	0.516179	0.540248	0.51222	0.524333	0.522051	0.499482	0.511979	0.50702	0.495283	0.521288
LIL-y4	0.506603	0.511944	0.507361	0.51846	0.487907	0.618012	0.527865	0.536688	0.512297	0.488782	0.505802	0.51153	0.502355	0.498675	0.48263	0.497388	0.490596	0.503423	0.475144	0.497122	0.5208	0.518987
SHA	0.507812	0.511327	0.520477	0.557453	0.496894	0.55814	0.568264	0.578117	0.561861	0.507132	0.495044	0.610343	0.50516	0.525521	0.532317	0.537122	0.512145	0.522326	0.499742	0.520605	0.539906	0.557792	0.531659
vzttmv3	0.501567	0.515447	0.526123	0.540625	0.50182	0.547101	0.575194	0.550591	0.517259	0.5	0.48056	0.630824	0.531056	0.538662	0.518616	0.514403	0.494038	0.52093	0.506977	0.514867	0.526865	0.540302	0.537736	0.63786
Emory2	0.483488	0.504548	0.53612	0.544271	0.49325	0.502326	0.501814	0.511111	0.496148	0.510236	0.491473	0.483256	0.488444	0.506018	0.491623	0.505443	0.513738	0.51118	0.5039	0.511664	0.510627	0.498704	0.487741	0.51633	0.511146
TTMV19-204	0.544932	0.536442	0.548556	0.518283	0.491812	0.491507	0.503727	0.505291	0.477848	0.517389	0.498932	0.488114	0.509215	0.516693	0.514667	0.489205	0.488189	0.497354	0.489699	0.478168	0.515247	0.504246	0.477492	0.524112	0.515683	0.504219
TTMV18-222	0.594158	0.560949	0.556257	0.517572	0.500531	0.525702	0.522897	0.502377	0.501058	0.532164	0.523962	0.495238	0.514961	0.518813	0.504849	0.497085	0.510021	0.517989	0.511886	0.494143	0.508966	0.517039	0.522508	0.514909	0.52297	0.507407	0.541469
SH-A	0.632505	0.530327	0.540881	0.525784	0.481481	0.508995	0.5168	0.499471	0.498418	0.500532	0.49176	0.481775	0.507636	0.507937	0.507495	0.489418	0.502896	0.506878	0.507937	0.4784	0.498145	0.49418	0.487426	0.524416	0.526933	0.508607	0.557316	0.590717
P9-3	0.489373	0.4912	0.527048	0.50598	0.460492	0.506211	0.50234	0.494093	0.489712	0.505208	0.495313	0.484895	0.503623	0.503423	0.496288	0.511423	0.4909	0.492731	0.500261	0.48882	0.495846	0.48499	0.47874	0.504406	0.500518	0.507402	0.513471	0.500263	0.487664
KS025	0.509927	0.511364	0.534581	0.524934	0.489171	0.510727	0.503145	0.521514	0.50962	0.510021	0.501837	0.488095	0.49035	0.509804	0.50266	0.496588	0.501837	0.505783	0.499737	0.488152	0.508938	0.490842	0.484317	0.517997	0.506792	0.520704	0.520767	0.508772	0.516163	0.606759
P1-2	0.510352	0.506944	0.527864	0.508827	0.485655	0.490439	0.487616	0.491577	0.476703	0.4875	0.504658	0.47137	0.489198	0.500785	0.484194	0.493789	0.489891	0.48934	0.478193	0.491201	0.48706	0.485552	0.469388	0.496136	0.501292	0.518858	0.512902	0.501316	0.501837	0.569044	0.603783
P7-3	0.49199	0.49168	0.499743	0.547325	0.487179	0.553672	0.555048	0.576357	0.531818	0.493963	0.498202	0.542051	0.522137	0.524845	0.538103	0.524316	0.495634	0.498447	0.506173	0.509834	0.511592	0.554875	0.520312	0.554027	0.557949	0.499487	0.507384	0.501592	0.487058	0.501032	0.505711	0.499744
BNI-700907-G3-SER0	0.523213	0.520666	0.524106	0.501052	0.46519	0.482704	0.499205	0.486814	0.454736	0.491034	0.458136	0.47327	0.491889	0.483546	0.483218	0.464248	0.465832	0.47288	0.476115	0.463836	0.487342	0.491311	0.475132	0.478146	0.498679	0.486501	0.592944	0.542328	0.548336	0.467809	0.476866	0.485417	0.479036
P15-8	0.488095	0.474727	0.48192	0.520792	0.47767	0.527285	0.528424	0.551923	0.556396	0.483131	0.481409	0.507812	0.51332	0.492126	0.500328	0.499679	0.489889	0.493464	0.493464	0.496063	0.497087	0.626667	0.531229	0.52594	0.54183	0.483531	0.472557	0.490275	0.482527	0.474308	0.478752	0.48366	0.543826	0.470154
Cpz1cl2	0.510453	0.530686	0.552846	0.588542	0.500287	0.547701	0.542383	0.537892	0.512209	0.519366	0.521589	0.543441	0.528302	0.525217	0.535963	0.552119	0.521159	0.54289	0.497701	0.531376	0.55	0.538022	0.520652	0.556128	0.546075	0.529245	0.51898	0.531788	0.49556	0.511761	0.516782	0.522584	0.545299	0.492677	0.513478
Cpz2cl2	0.49234	0.527107	0.54087	0.5344	0.482961	0.508439	0.505618	0.485232	0.496038	0.626984	0.546088	0.48633	0.495481	0.502654	0.498117	0.487016	0.5069	0.487098	0.510616	0.494658	0.494692	0.509835	0.475655	0.507407	0.502905	0.508716	0.507479	0.51327	0.500532	0.510236	0.516746	0.506329	0.505839	0.466346	0.492929	0.527091
GorMcl4	0.516146	0.545996	0.566408	0.552795	0.499738	0.520833	0.518634	0.510562	0.492864	0.537566	0.534275	0.518805	0.542961	0.537618	0.513781	0.53056	0.524845	0.51439	0.519562	0.504747	0.536688	0.511043	0.485185	0.514403	0.528341	0.529928	0.541001	0.5392	0.522293	0.529687	0.515152	0.513542	0.51631	0.523734	0.502274	0.573883	0.544391
P1-c12	0.511905	0.467638	0.487855	0.528986	0.482525	0.532091	0.540832	0.607071	0.61592	0.485039	0.456578	0.510975	0.515714	0.516096	0.516247	0.509473	0.504141	0.499479	0.478712	0.483229	0.514019	0.597892	0.52057	0.536723	0.531882	0.489373	0.480892	0.499736	0.506075	0.473549	0.49662	0.482564	0.56422	0.479726	0.577143	0.519154	0.502116	0.512821
P1-c15	0.495013	0.501079	0.510761	0.520933	0.489915	0.496855	0.488323	0.491339	0.491311	0.95379	0.549236	0.493187	0.50079	0.498403	0.482814	0.491786	0.506603	0.484656	0.515055	0.474156	0.508493	0.487302	0.488	0.498945	0.496825	0.507862	0.520299	0.528132	0.497608	0.503391	0.51153	0.48986	0.487907	0.487098	0.480054	0.516755	0.634494	0.534181	0.48265
P1-c16	0.506603	0.53453	0.543053	0.564346	0.490165	0.524409	0.504747	0.506309	0.489205	0.575328	0.582145	0.504971	0.508386	0.522739	0.49707	0.521762	0.506075	0.520701	0.515103	0.485138	0.517753	0.492891	0.510933	0.526371	0.531746	0.545312	0.523193	0.542473	0.506688	0.525601	0.525621	0.508634	0.515199	0.478077	0.486139	0.537522	0.5536	0.558333	0.492114	0.580169
P1-c22	0.539116	0.63908	0.574011	0.519591	0.511641	0.516638	0.515563	0.519707	0.486486	0.523322	0.518519	0.486182	0.506215	0.494331	0.483152	0.483305	0.48521	0.495465	0.503691	0.491554	0.50565	0.49096	0.498855	0.51732	0.520408	0.51448	0.543379	0.560502	0.529782	0.503666	0.506003	0.499435	0.492063	0.531624	0.475221	0.531661	0.518959	0.574673	0.492386	0.524217	0.534137
P3-c4	0.501312	0.512446	0.49763	0.541932	0.508359	0.529995	0.54441	0.519271	0.517007	0.507479	0.489485	0.518053	0.528165	0.525379	0.531813	0.51973	0.517585	0.51875	0.534375	0.521327	0.633489	0.514481	0.534392	0.553983	0.524856	0.508882	0.49418	0.502385	0.49787	0.504462	0.493122	0.491118	0.518053	0.469431	0.50853	0.534843	0.494949	0.520403	0.515486	0.498397	0.517204	0.508802
P4-c4	0.551486	0.855698	0.586899	0.522204	0.485821	0.517223	0.519592	0.508013	0.497346	0.5024	0.51129	0.493886	0.496522	0.510501	0.511931	0.496533	0.493867	0.517685	0.479936	0.49732	0.518104	0.4896	0.520666	0.52916	0.517149	0.499735	0.541201	0.570968	0.534722	0.484416	0.504287	0.511111	0.503445	0.525784	0.475997	0.538919	0.529791	0.540193	0.474133	0.502137	0.519655	0.642735	0.504287
P5-c2	0.50959	0.467638	0.493023	0.532191	0.474178	0.544652	0.536523	0.583588	0.610778	0.492138	0.478579	0.509502	0.524691	0.514867	0.526646	0.528505	0.505962	0.513062	0.494792	0.499739	0.502588	0.606838	0.513471	0.551084	0.545123	0.511423	0.493376	0.498413	0.504233	0.491499	0.506771	0.494856	0.562532	0.471698	0.588571	0.515152	0.498938	0.529019	0.724963	0.488433	0.501577	0.481669	0.507384	0.4832
P8-c6	0.51633	0.508347	0.536951	0.567079	0.490015	0.587326	0.555726	0.54977	0.526183	0.513999	0.496377	0.529835	0.511282	0.52093	0.530538	0.540458	0.516279	0.527433	0.510562	0.510417	0.530538	0.533232	0.560963	0.569444	0.564972	0.498712	0.509274	0.523126	0.514286	0.502596	0.50209	0.483771	0.544444	0.4792	0.52254	0.568995	0.519873	0.531795	0.523374	0.509494	0.506582	0.506803	0.552756	0.515442	0.540775
P8-c16	0.622807	0.527107	0.538341	0.521693	0.488924	0.509524	0.528132	0.503423	0.497638	0.518104	0.499203	0.486572	0.502096	0.496051	0.503463	0.497104	0.482415	0.50766	0.515008	0.4816	0.508188	0.494726	0.496522	0.521395	0.519169	0.506289	0.561348	0.588731	0.861239	0.488189	0.524642	0.507087	0.481073	0.537771	0.480294	0.496744	0.503727	0.527734	0.502103	0.515683	0.519529	0.540092	0.501597	0.532051	0.500263	0.515534
P8-c17	0.565879	0.562262	0.54713	0.521036	0.5	0.519529	0.51427	0.48344	0.490948	0.516908	0.514469	0.502137	0.497076	0.515784	0.51711	0.495192	0.489633	0.508574	0.495987	0.50911	0.5072	0.494086	0.500541	0.52358	0.518339	0.508013	0.578025	0.591653	0.576964	0.492267	0.505342	0.515924	0.5072	0.570594	0.49187	0.535372	0.500539	0.535158	0.484267	0.506667	0.527778	0.542742	0.490354	0.571429	0.49787	0.501879	0.573927
P8-c21	0.494863	0.500293	0.5382	0.507991	0.471477	0.486018	0.483529	0.480245	0.480491	0.505727	0.512085	0.467002	0.476349	0.49347	0.490878	0.484899	0.473834	0.488777	0.475788	0.462185	0.489671	0.487915	0.473595	0.489636	0.467002	0.492437	0.49331	0.495652	0.47561	0.531653	0.580499	0.543624	0.481295	0.467927	0.466667	0.511802	0.51468	0.538418	0.469136	0.507172	0.508591	0.522819	0.461017	0.504065	0.480359	0.489409	0.491289	0.504378
P9-c3	0.482919	0.491143	0.509072	0.513219	0.482236	0.563665	0.555036	0.554364	0.504339	0.489796	0.488263	0.93646	0.503359	0.501304	0.50843	0.507447	0.481195	0.510384	0.506211	0.488226	0.533955	0.529321	0.525157	0.619048	0.642564	0.485552	0.494982	0.50582	0.491005	0.487455	0.489648	0.472904	0.548023	0.473795	0.516276	0.547213	0.493691	0.52322	0.518405	0.493187	0.509434	0.490694	0.526426	0.497076	0.522856	0.538382	0.495781	0.50641	0.472036
P7-c7	0.528755	0.497156	0.537741	0.546265	0.482153	0.619048	0.555006	0.539813	0.534322	0.490163	0.522876	0.536854	0.51864	0.498885	0.521935	0.504652	0.488115	0.519868	0.487221	0.492896	0.537528	0.535	0.6	0.54844	0.565789	0.497231	0.493806	0.524691	0.512168	0.502496	0.48505	0.473278	0.535073	0.489899	0.52008	0.560662	0.507295	0.528793	0.521282	0.487915	0.512994	0.52012	0.518457	0.50737	0.546466	0.577155	0.519209	0.504794	0.5
P7-c12	0.504406	0.494901	0.508475	0.511979	0.469291	0.495594	0.491173	0.503349	0.4871	0.498428	0.487299	0.489744	0.484238	0.496845	0.492853	0.491965	0.477743	0.492436	0.47956	0.471264	0.484611	0.49298	0.476793	0.508554	0.482633	0.480226	0.511358	0.496845	0.509989	0.575711	0.630589	0.563673	0.494342	0.458725	0.479578	0.506344	0.503175	0.508307	0.485082	0.498433	0.499213	0.481859	0.477463	0.495481	0.5	0.488058	0.519453	0.501321	0.544482
P7-c14	0.50541	0.50641	0.529533	0.529744	0.5	0.551459	0.550329	0.568538	0.562468	0.502887	0.488132	0.534967	0.529382	0.518576	0.527677	0.523155	0.488718	0.517313	0.499234	0.506955	0.521896	0.557419	0.51973	0.566009	0.548569	0.485174	0.497897	0.510053	0.494997	0.506934	0.516279	0.500255	0.598599	0.474399	0.527564	0.527541	0.509773	0.510194	0.562659	0.497113	0.514345	0.518644	0.524403	0.524564	0.552672	0.552004	0.501048	0.506133	0.498604
P1-c24	0.486542	0.476651	0.512701	0.517885	0.483281	0.56677	0.549325	0.543134	0.517611	0.496075	0.485133	0.86939	0.510594	0.504956	0.507903	0.513611	0.487378	0.521288	0.498965	0.481423	0.532919	0.531379	0.525157	0.609319	0.633333	0.482972	0.490755	0.503704	0.489947	0.488991	0.493271	0.467791	0.542373	0.468553	0.51237	0.536405	0.494217	0.517028	0.509202	0.497904	0.508386	0.483926	0.523286	0.497076	0.520801	0.544565	0.489979	0.502137	0.469799
P1-c25	0.518809	0.518757	0.52381	0.546875	0.492212	0.835874	0.578295	0.555212	0.536951	0.489239	0.50959	0.560041	0.514403	0.507588	0.520548	0.534261	0.505711	0.507246	0.494824	0.51501	0.526698	0.557284	0.623639	0.563307	0.563147	0.496641	0.494161	0.539481	0.51164	0.496894	0.489273	0.48062	0.562404	0.490566	0.52334	0.550575	0.508439	0.519792	0.537785	0.49109	0.535433	0.508178	0.53469	0.512984	0.530845	0.582043	0.514815	0.512039	0.486018
P3-c8	0.49923	0.511218	0.520737	0.549411	0.494376	0.578626	0.552511	0.566667	0.547691	0.505225	0.495356	0.544852	0.505835	0.523369	0.505176	0.524747	0.502556	0.536837	0.511996	0.50258	0.535182	0.550835	0.555556	0.574468	0.570041	0.512506	0.52231	0.517114	0.497638	0.49641	0.500258	0.486473	0.536842	0.478125	0.520793	0.561613	0.507087	0.519817	0.55404	0.501304	0.518809	0.517766	0.542443	0.511358	0.566869	0.675716	0.499478	0.503185	0.505843
P3-c9	0.628882	0.52657	0.536164	0.525784	0.486772	0.506878	0.528533	0.506349	0.500527	0.513845	0.500797	0.490227	0.506582	0.497884	0.504818	0.497884	0.481833	0.510582	0.513228	0.480533	0.501325	0.496825	0.489032	0.515924	0.52	0.508607	0.559429	0.585443	0.862385	0.487139	0.524642	0.509186	0.486529	0.541469	0.481855	0.496744	0.5	0.522293	0.503434	0.513025	0.509898	0.538373	0.498403	0.530449	0.503175	0.512169	0.945212	0.579087	0.487224
P6-c3	0.65745	0.538996	0.557623	0.539432	0.502629	0.511774	0.510021	0.491641	0.50286	0.505765	0.494253	0.482525	0.504687	0.504717	0.500797	0.5	0.518172	0.516299	0.518577	0.497638	0.514196	0.499213	0.503692	0.523134	0.518167	0.502596	0.566719	0.589063	0.636739	0.50754	0.526509	0.533749	0.4987	0.552262	0.490982	0.525641	0.520106	0.523585	0.489306	0.504193	0.505291	0.538635	0.500792	0.549735	0.515674	0.523286	0.635191	0.589583	0.504009
P8-c22	0.501035	0.507551	0.501553	0.530208	0.477449	0.537785	0.581157	0.550459	0.517665	0.496825	0.479395	0.52795	0.504601	0.509158	0.506828	0.496894	0.510903	0.504434	0.494808	0.484848	0.527348	0.529533	0.510938	0.548504	0.535826	0.490741	0.482777	0.501058	0.49551	0.498186	0.488506	0.481195	0.533231	0.466351	0.507106	0.530694	0.502924	0.50959	0.517829	0.501587	0.497104	0.503982	0.531759	0.5056	0.529835	0.539291	0.491588	0.495987	0.478992
P8-c23	0.495614	0.52235	0.553894	0.54891	0.498765	0.516388	0.517134	0.484848	0.491099	0.590082	0.626168	0.495695	0.515829	0.518868	0.495955	0.497217	0.496879	0.499378	0.513631	0.494465	0.518862	0.484568	0.504065	0.511772	0.503401	0.511772	0.514864	0.538413	0.511791	0.520717	0.51817	0.509913	0.495663	0.49563	0.4862	0.524164	0.545512	0.567349	0.485467	0.592453	0.588198	0.543561	0.521576	0.524984	0.508318	0.53358	0.524538	0.525641	0.53927
P8-c24	0.670262	0.544055	0.546729	0.542391	0.514961	0.513584	0.523508	0.511006	0.513062	0.501052	0.497104	0.489306	0.516954	0.511811	0.506363	0.498955	0.516667	0.516535	0.517585	0.514241	0.51706	0.511041	0.506349	0.525316	0.531859	0.500259	0.574713	0.599269	0.628601	0.502333	0.521785	0.531981	0.499738	0.547396	0.493952	0.531342	0.515534	0.531859	0.498168	0.495538	0.497095	0.557812	0.500527	0.56872	0.517296	0.51782	0.632716	0.589784	0.49455
P8-c25	0.497917	0.502981	0.499222	0.531056	0.485788	0.533333	0.528594	0.515152	0.496672	0.502654	0.481884	0.515528	0.516848	0.503912	0.522941	0.51932	0.50337	0.523511	0.507517	0.51278	0.536688	0.492483	0.511322	0.534884	0.508772	0.491499	0.498675	0.494933	0.494418	0.50442	0.506813	0.485552	0.50587	0.484227	0.480832	0.565242	0.480235	0.527735	0.491473	0.505034	0.50766	0.499145	0.530472	0.506431	0.494038	0.523226	0.502116	0.506989	0.476271
P8-c26	0.549112	0.52957	0.556253	0.510616	0.491812	0.495767	0.522293	0.505802	0.476793	0.518162	0.501065	0.482011	0.501312	0.521395	0.513067	0.491311	0.488959	0.498945	0.494982	0.487507	0.514675	0.493376	0.479871	0.518873	0.514377	0.50211	0.862532	0.559768	0.554675	0.503962	0.517039	0.519515	0.510053	0.594409	0.457831	0.517794	0.509081	0.545261	0.482011	0.5168	0.507012	0.556314	0.495253	0.538133	0.495238	0.506094	0.561348	0.57619	0.492174
P10-c8	0.56378	0.561547	0.552743	0.516721	0.502151	0.516854	0.521809	0.48344	0.490948	0.504563	0.506967	0.501068	0.491228	0.507758	0.512765	0.496261	0.478469	0.503751	0.485821	0.516077	0.507733	0.496237	0.502706	0.511828	0.522654	0.517094	0.570594	0.586371	0.58147	0.497067	0.504274	0.512739	0.5	0.571125	0.476287	0.530576	0.501079	0.540729	0.4784	0.501867	0.52451	0.552496	0.495177	0.562939	0.498403	0.513688	0.581606	0.854914	0.495322
P10-c9	0.473657	0.4962	0.494505	0.52712	0.475144	0.494289	0.501826	0.494342	0.475969	0.579801	0.531038	0.470192	0.504103	0.497653	0.482322	0.486068	0.486501	0.488889	0.494289	0.474238	0.48409	0.472004	0.469312	0.488021	0.484611	0.518346	0.51065	0.501321	0.490446	0.505962	0.518461	0.495356	0.485744	0.462062	0.452569	0.50463	0.572555	0.520376	0.472265	0.583464	0.549451	0.500283	0.49194	0.499195	0.483804	0.479688	0.504777	0.484267	0.506757
P7-c21	0.499478	0.516234	0.538742	0.551724	0.50079	0.527473	0.507612	0.494792	0.479005	0.544638	0.601461	0.474857	0.490596	0.49418	0.497603	0.511251	0.495044	0.515008	0.507862	0.488226	0.501052	0.484563	0.496825	0.534896	0.503145	0.50026	0.509524	0.533759	0.496273	0.516901	0.5	0.502077	0.487539	0.477392	0.475529	0.534951	0.550586	0.535733	0.470313	0.550449	0.562566	0.537543	0.489102	0.528939	0.479395	0.514629	0.5	0.525867	0.512251
P7-c23	0.75	0.541333	0.532191	0.501312	0.498692	0.5191	0.511286	0.498958	0.490135	0.506056	0.490785	0.485699	0.495342	0.466979	0.489958	0.478125	0.473958	0.476714	0.48404	0.484705	0.508086	0.496865	0.497884	0.509434	0.506562	0.492506	0.545264	0.581116	0.639361	0.504658	0.502612	0.503623	0.48934	0.539832	0.496667	0.498834	0.504747	0.523585	0.49766	0.502103	0.496825	0.544009	0.493438	0.54584	0.496354	0.498958	0.631173	0.557662	0.481418
[truncated: 17 more columns]
