# Supplementary material for: Deep viral blood metagenomics reveals extensive anellovirus diversity in healthy humans
Source: Sci Rep. 2021 Mar 25;11:6921. doi: 10.1038/s41598-021-86427-4 (PMC7994813; doi:10.1038/s41598-021-86427-4)
Supplement: Supplementary file 10 — Supplementary Information 10. [file 41598_2021_86427_MOESM10_ESM.xlsx]

## Sheet: MatrixOutput
Genotype/Isolate	TTMDV1-MD1-073	TTMDV2-MD2-013	TTMDV3-2PoSMA	TTMDV4-6PoSMA	TTMDV5-MDJHem2	TTMDV6-MDJHem3-1	TTMDV7-MDJHem3-2	MDJHem5	TTMDV9-MDJN2	TTMDV10-MDJN14	TTMDV11-MDJN47	TTMDV12-MDJN51	TTMDV13-MDJN69	TTMDV14-MDJN97	TTMDV15-Pt-TTMDV210	TTMDV8-MDJN1	P6	P7-c18	P7-c19	P7-c20	P2-c8	P1-c19	P7-c3	P8-c18	P9-c5	P3-c5	P12-c3	P7-c17	P1-c23	P1-c26	P1-c27	P7-c22	P7-c24
TTMDV1-MD1-073
TTMDV2-MD2-013	0.57997
TTMDV3-2PoSMA	0.597984	0.538077
TTMDV4-6PoSMA	0.572154	0.543003	0.620038
TTMDV5-MDJHem2	0.598278	0.563986	0.542533	0.570041
TTMDV6-MDJHem3-1	0.590634	0.580808	0.565465	0.552147	0.584475
TTMDV7-MDJHem3-2	0.560926	0.563288	0.522999	0.555896	0.559777	0.545134
MDJHem5	0.638723	0.570571	0.587452	0.584482	0.587034	0.577372	0.569909
TTMDV9-MDJN2	0.560976	0.575943	0.545513	0.5258	0.56359	0.54624	0.547074	0.544852
TTMDV10-MDJN14	0.572948	0.556061	0.551768	0.557092	0.57063	0.559777	0.538384	0.557252	0.535988
TTMDV11-MDJN47	0.565749	0.566769	0.541267	0.519211	0.561376	0.54926	0.558614	0.551618	0.595494	0.537913
TTMDV12-MDJN51	0.554205	0.564103	0.536862	0.535276	0.568747	0.549823	0.577273	0.550636	0.557761	0.533131	0.552147
TTMDV13-MDJN69	0.549672	0.61086	0.547395	0.537405	0.535948	0.55287	0.553544	0.561992	0.557761	0.547655	0.559633	0.574158
TTMDV14-MDJN97	0.584716	0.582202	0.542533	0.542624	0.555218	0.573737	0.593263	0.549139	0.555556	0.562626	0.556065	0.592817	0.574522
TTMDV15-Pt-TTMDV210	0.504894	0.489438	0.47767	0.4883	0.496904	0.504879	0.491012	0.497674	0.50774	0.48194	0.499481	0.499486	0.502564	0.497175
TTMDV8-MDJN1	0.583588	0.566769	0.541746	0.538146	0.589744	0.566462	0.552323	0.582693	0.557276	0.569168	0.542119	0.548569	0.547583	0.570122	0.506771
P6	0.536864	0.524327	0.500971	0.501304	0.517081	0.511387	0.526098	0.515861	0.534268	0.50801	0.533229	0.513416	0.508475	0.511387	0.552808	0.520083
P7-c18	0.56544	0.567996	0.549096	0.530208	0.565015	0.571429	0.571063	0.559505	0.58038	0.556237	0.625695	0.553846	0.548387	0.56473	0.499479	0.548504	0.532808
P7-c19	0.556575	0.566259	0.53861	0.534268	0.574074	0.567126	0.569827	0.565485	0.596006	0.546381	0.690404	0.57362	0.547218	0.555894	0.49194	0.557445	0.529566	0.633283
P7-c20	0.561757	0.572981	0.551702	0.535958	0.56025	0.563147	0.567288	0.553998	0.583851	0.555383	0.645673	0.556247	0.570911	0.556936	0.49921	0.558346	0.519873	0.695003	0.63585
P2-c8	0.585354	0.576768	0.553447	0.547546	0.580416	0.671198	0.548811	0.566412	0.553854	0.557244	0.543267	0.55134	0.562437	0.564297	0.478844	0.556234	0.511146	0.560327	0.558959	0.544982
P1-c19	0.565915	0.552724	0.551572	0.556234	0.601515	0.573232	0.555893	0.560606	0.549411	0.576865	0.5434	0.552352	0.565108	0.577912	0.49253	0.584089	0.530749	0.540318	0.535586	0.545123	0.568479
P7-c3	0.597684	0.552724	0.567855	0.547764	0.610606	0.546606	0.558081	0.584093	0.581288	0.570922	0.559487	0.565962	0.56008	0.572869	0.500514	0.587998	0.511868	0.553672	0.559652	0.554688	0.576631	0.626548
P8-c18	0.570552	0.556237	0.525543	0.555385	0.604006	0.570405	0.561861	0.582948	0.570691	0.581288	0.550207	0.54908	0.556065	0.570846	0.500521	0.745746	0.522692	0.566925	0.566047	0.563941	0.568298	0.607071	0.590909
P9-c5	0.58002	0.566259	0.564054	0.558475	0.585765	0.576314	0.560976	0.589231	0.570108	0.557761	0.552821	0.569678	0.545038	0.580923	0.499222	0.629403	0.52648	0.566154	0.564928	0.567343	0.557938	0.585627	0.604995	0.653374
P3-c5	0.580678	0.593041	0.544823	0.565284	0.566717	0.58156	0.594049	0.585242	0.579511	0.586224	0.560814	0.589899	0.586103	0.603127	0.499227	0.587545	0.528896	0.572086	0.582697	0.568841	0.561803	0.591185	0.566009	0.58998	0.568747
P12-c3	0.559059	0.547331	0.518308	0.522646	0.553191	0.557905	0.597475	0.55	0.533232	0.536077	0.550281	0.621074	0.590015	0.584848	0.513138	0.545501	0.503115	0.529442	0.548749	0.545549	0.54798	0.55303	0.55101	0.551459	0.545501	0.577879
P7-c17	0.568389	0.577508	0.54943	0.527478	0.574555	0.566717	0.613131	0.556911	0.558614	0.556904	0.557427	0.579534	0.553364	0.652504	0.50077	0.557092	0.528682	0.56359	0.56953	0.571946	0.548601	0.559451	0.579401	0.560513	0.570992	0.586364	0.5625
P1-c23	0.559836	0.575758	0.554481	0.542188	0.574446	0.567692	0.565796	0.575711	0.590021	0.549231	0.577949	0.577436	0.568507	0.55658	0.496343	0.562629	0.526509	0.571575	0.580133	0.578646	0.552995	0.545455	0.552131	0.5647	0.566358	0.576923	0.54359	0.562757
P1-c26	0.569106	0.557761	0.547482	0.544376	0.580266	0.568598	0.564181	0.546012	0.548718	0.76176	0.547035	0.528033	0.553526	0.577643	0.488613	0.569678	0.495833	0.557771	0.556406	0.560062	0.571284	0.570992	0.576453	0.591002	0.56524	0.579027	0.536188	0.567073	0.541538
P1-c27	0.57121	0.577436	0.549359	0.551262	0.594248	0.584356	0.550102	0.576646	0.560888	0.579487	0.551242	0.566154	0.563042	0.588175	0.515625	0.673282	0.540752	0.569509	0.570175	0.563417	0.568298	0.598264	0.604199	0.676814	0.641143	0.591398	0.546012	0.570256	0.576605	0.565796
P7-c22	0.585096	0.559416	0.558694	0.56422	0.626324	0.545134	0.543303	0.581431	0.560652	0.558257	0.55726	0.55101	0.559578	0.564297	0.508475	0.571063	0.526615	0.543077	0.560838	0.553998	0.549317	0.597684	0.614379	0.580645	0.580662	0.586242	0.548842	0.567021	0.561538	0.561992	0.596626
P7-c24	0.577198	0.595092	0.541828	0.535306	0.554186	0.575804	0.558793	0.569659	0.577675	0.559816	0.568416	0.564928	0.588685	0.579644	0.485179	0.564499	0.536368	0.553498	0.561026	0.555207	0.56524	0.558793	0.555044	0.560372	0.552469	0.597137	0.555215	0.572162	0.563467	0.558448	0.556244	0.562883
P7-c25	0.578221	0.553681	0.531928	0.539487	0.594248	0.572453	0.564928	0.579866	0.567079	0.574642	0.552277	0.54499	0.551478	0.56473	0.504687	0.743744	0.527387	0.567959	0.560888	0.56761	0.56371	0.587374	0.602525	0.883558	0.643149	0.586401	0.544291	0.567179	0.569876	0.583333	0.682419	0.570405	0.562436
